# Supplementary material
Source: publisher figshare collection journal article supplement (https://acs.figshare.com/ndownloader/files/3791845)
Supplement: Supplementary file 1 [file 3791845]

# High-resolution native tandem mass-spectrometry of antibody-drug conjugates and higher order antibody-antigen complexes.

## (High-resolution native tandem mass-spectrometry of antibody-based therapeutic constructs)

Andrey Dyachenko<sup>1,2</sup>, Guanbo Wang<sup>1,2</sup>, Mike Belov<sup>3</sup>, Alexander Makarov<sup>1,3</sup>, Rob N. de Jong<sup>4</sup>, Ewald T.J van den Bremer<sup>4</sup>, Paul W.H.I. Parren<sup>4,5</sup>, Albert J.R. Heck<sup>1,2</sup>.

1. Biomolecular Mass Spectrometry and Proteomics. Bijvoet Centre for Biomolecular Research and Utrecht Institute for Pharmaceutical Sciences, University of Utrecht, Padualaan 8, 3584 CH, Utrecht, The Netherlands.
2. Netherlands Proteomics Center, Padualaan 8, 3584 CH, Utrecht, The Netherlands.
3. ThermoFisher Scientific, Bremen, Germany.
4. Genmab, Utrecht, The Netherlands
5. Department of Immunohematology and Blood Transfusion, Leiden University Medical Center, 2333 ZA Leiden, The Netherlands

## Supporting information

### Materials and methods

**Instrument modifications.** Orbitrap Exactive Plus mass spectrometer (Thermo Fisher Scientific, Bremen, Germany) was modified for optimal transmission and detection of ions with  $m/z$  up to 50,000<sup>20,21,22</sup> (Figure S1). A dedicated gas line was installed to allow control over the pressure and type of gas introduced into the HCD cell for the more efficient cooling and desolvation of heavy ions. Furthermore, the operating frequency of the front-end RF guides and the HCD cell was lowered to improve ion transmission and diminish the ion loss during activation at high energies; a preamplifier with lower high-pass filter cutoff was used to improve transmission of lower frequency image current signals originating from ions with larger  $m/z$ . For ion isolation we used a standard quadrupole mass filter from a Q Exactive™ instrument with a modified electronic board that featured decreased resonance frequency of 284 kHz and an upper mass-selection limit above 20000  $m/z$ .

**Materials.** Brentuximab vedotin was acquired as a formulated drug from Seattle Genetics (Seattle, WA). The ADC was extracted from these formulation as described earlier<sup>15</sup>. IgG mutants were generated at Genmab (Utrecht, The Netherlands). Peptide-N-Glycosidase F (PNGase F) was purchased from Roche (Manheim, Germany). All other materials were purchased from Sigma Aldrich (Germany).

**Generation of non-glycosylated soluble CD38.** A codon-optimized construct was generated for the expression of non-glycosylated recombinant His-tagged soluble CD38. PCR was used to amplify the part encoding for the extracellular soluble domain of CD38 from the construct, adding a N-terminal His tag containing six His residues (CD38-ECDHis). Four asparagine amino acids located in specific N-linked

glycosylation recognition sequences were mutated. The construct was cloned in pEE13.4 (Lonza Biologics) and transfected into Freestyle 293-F cells (HEK-293F, Invitrogen). Non-glycosylated CD38-ECDHis was expressed and subsequently purified from cell supernatant using immobilized metal affinity chromatography.

**Sample preparation.** The extracted ADC brentuximab vedotin was incubated overnight in the presence of PNGase F (1 u per 10 µg of protein) for deglycosylation. The deglycosylated ADC was buffer-exchanged into aqueous ammonium acetate (AmAc, 150 mM, pH 7.5) using Amicon Ultra centrifugal filter units (Merck Millipore) with 10kDa MWCO and the sample concentration was adjusted to 5 µM prior to analysis. For partial disulfide bond reduction, the ADC was incubated with 2mM of dithiothreitol (DTT) for 30 minutes and analyzed directly afterwards. IgG1 and non-glycosylated CD38 were buffer-exchanged using Amicon Ultra centrifugal filter units (Merck Millipore) with 10kDa MWCO.

**Quadrupole ion transmission calculations.** The ion transmission through quadrupole was calculated based on the RawOvFtT factor value that is stored for each scan in the Thermo .RAW file format. The RawOvFtT factor describes ion count (IC) in the Orbitrap FT cell. The IC corresponding to the peak of interest in the full scan mode is calculated as a fraction of the total IC (eq S1). The ion transmission is the ratio between this value and the IC in the isolation mode (eq. S2).

$$IC_{Full}^i = IC_{Full} \frac{I_i}{I_{\Sigma}} \quad (S1)$$

$$IT = \frac{IC_{iso}^i}{IC_{Full}^i} \quad (S2)$$

where  $IC_{Full}^i$  and  $IC_{iso}^i$  are the ion count values corresponding to  $i$  peak in the full scan and isolation modes, respectively;  $IC_{Full}$  is the RawOvFtT value in the full scan mode;  $I_{\Sigma}$  is the summed ion intensity in the full scan mode;  $I_i$  is the intensity of the ion of interest and  $IT$  is the ion transmission.

## Supporting figures

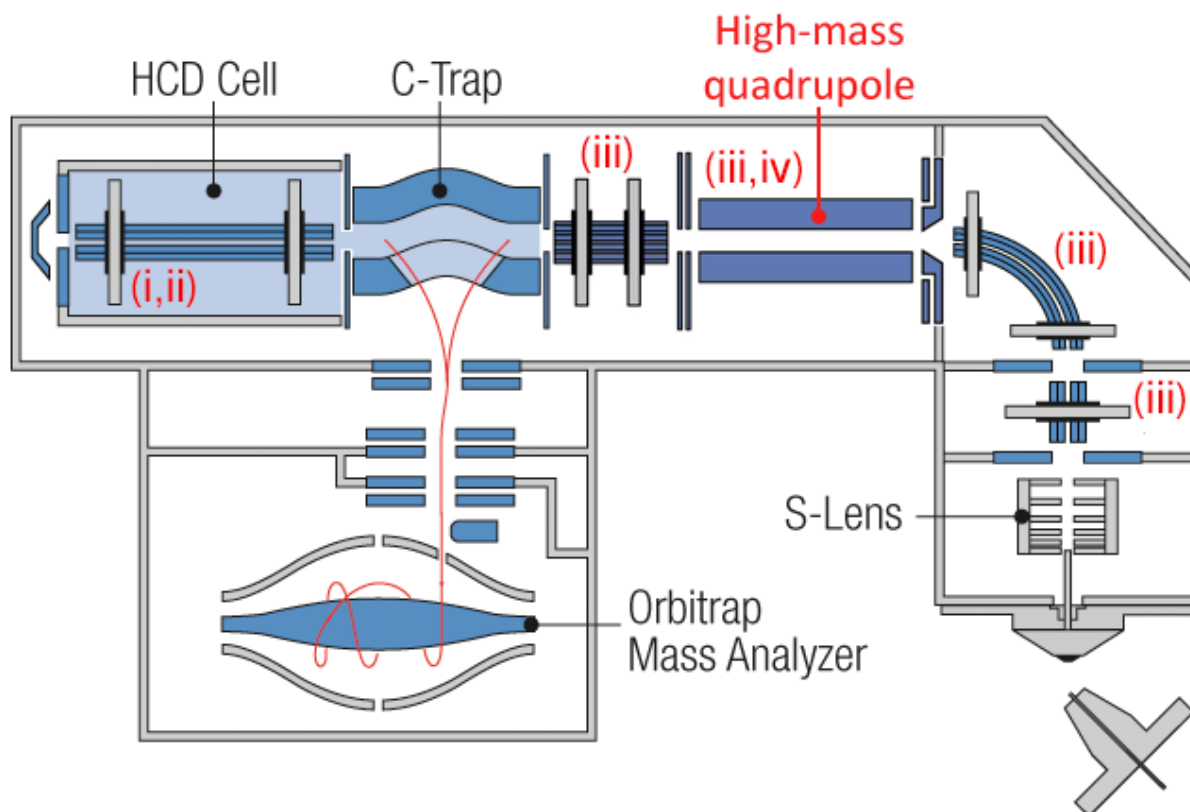

Figure S1. Schematic of the Orbitrap Exactive Plus mass-spectrometer modified for optimal transmission and detection of ions with  $m/z$  up to 50,000. The ions are trapped in the HCD cell for efficient cooling and optional collisional activation (i); dedicated gas line enables control over the pressure and the type of gas in the HCD cell (ii); RF frequencies on the transfer ion guides are lowered and manual control over the transfer optics DC offsets is enabled (iii); high-mass quadrupole with a resonance frequency of 284 kHz and a upper mass-selection limit of 20000  $m/z$  (iv).

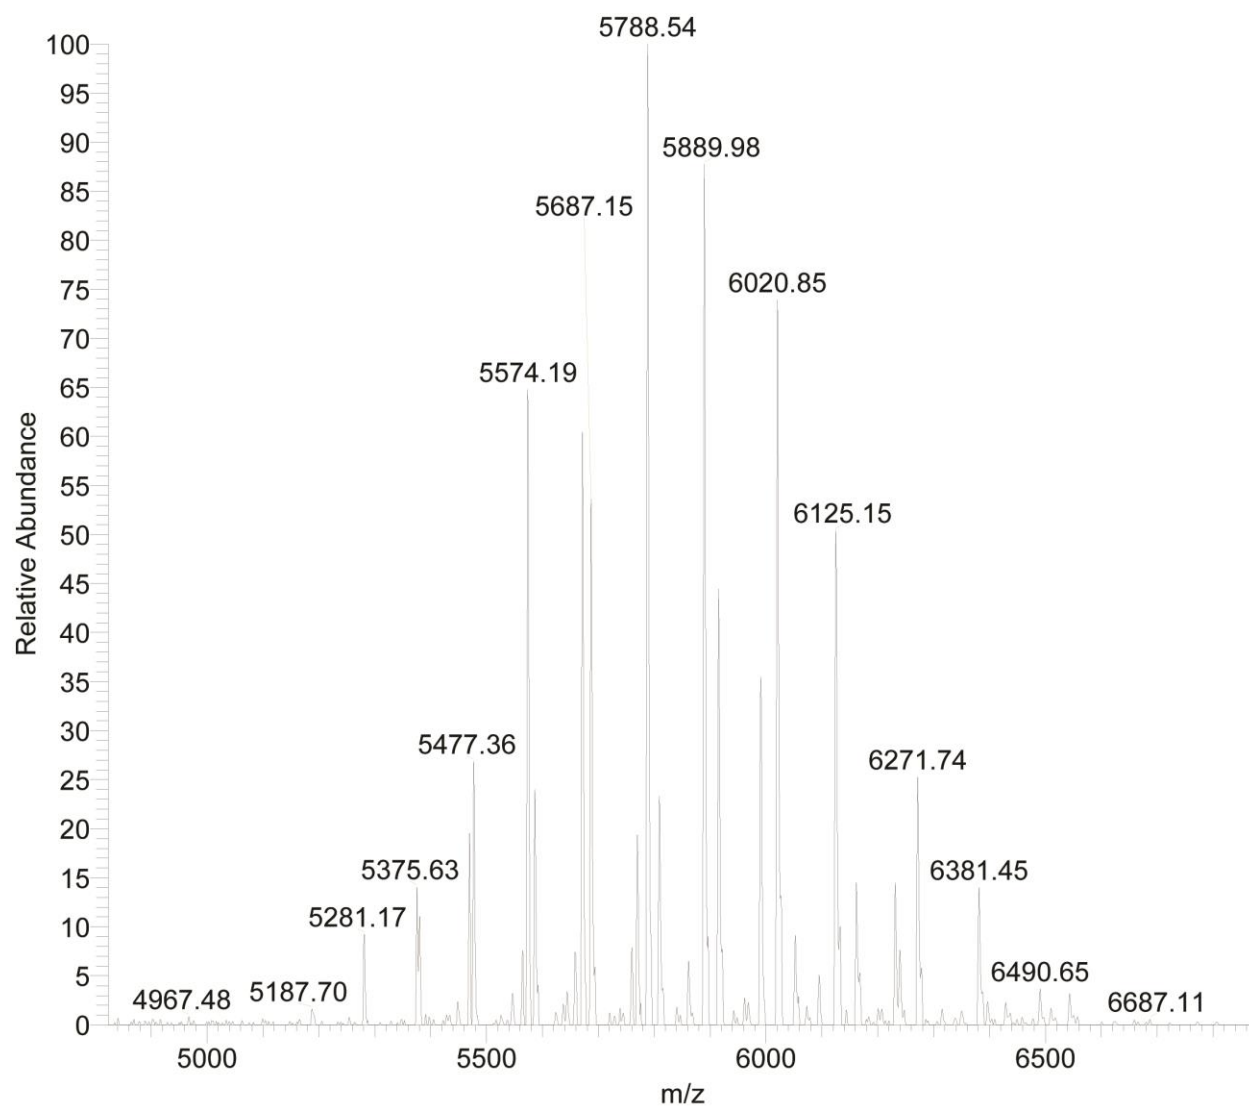

Figure S2. Full MS spectrum of partially reduced brentuximab vedotin. An average increase in mass of about 70 ppm is due to lower transmission and acceleration voltages used in order to prevent dissociation of the reduced sample, but leading to less efficient desolvation.

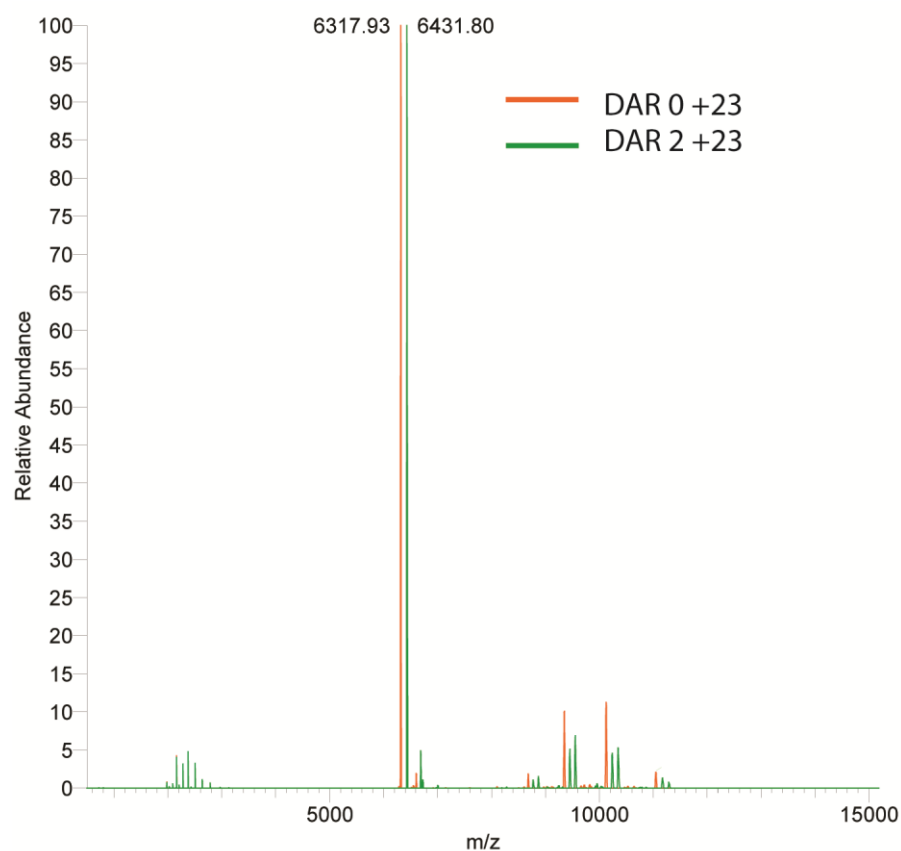

Figure S3. Fragmentation spectra of DAR0 species (+23 charge, orange) and DAR2 species (+23, green) shown on the same plot for comparison. Each spectrum combines 100 scans of 10 microscans each acquired at 17500@200 resolution. The calculated intensity ratio of parent ion relative to the fragment ions are 79.8:20.2 (DAR0) and 79.1:20:9 (DAR2).

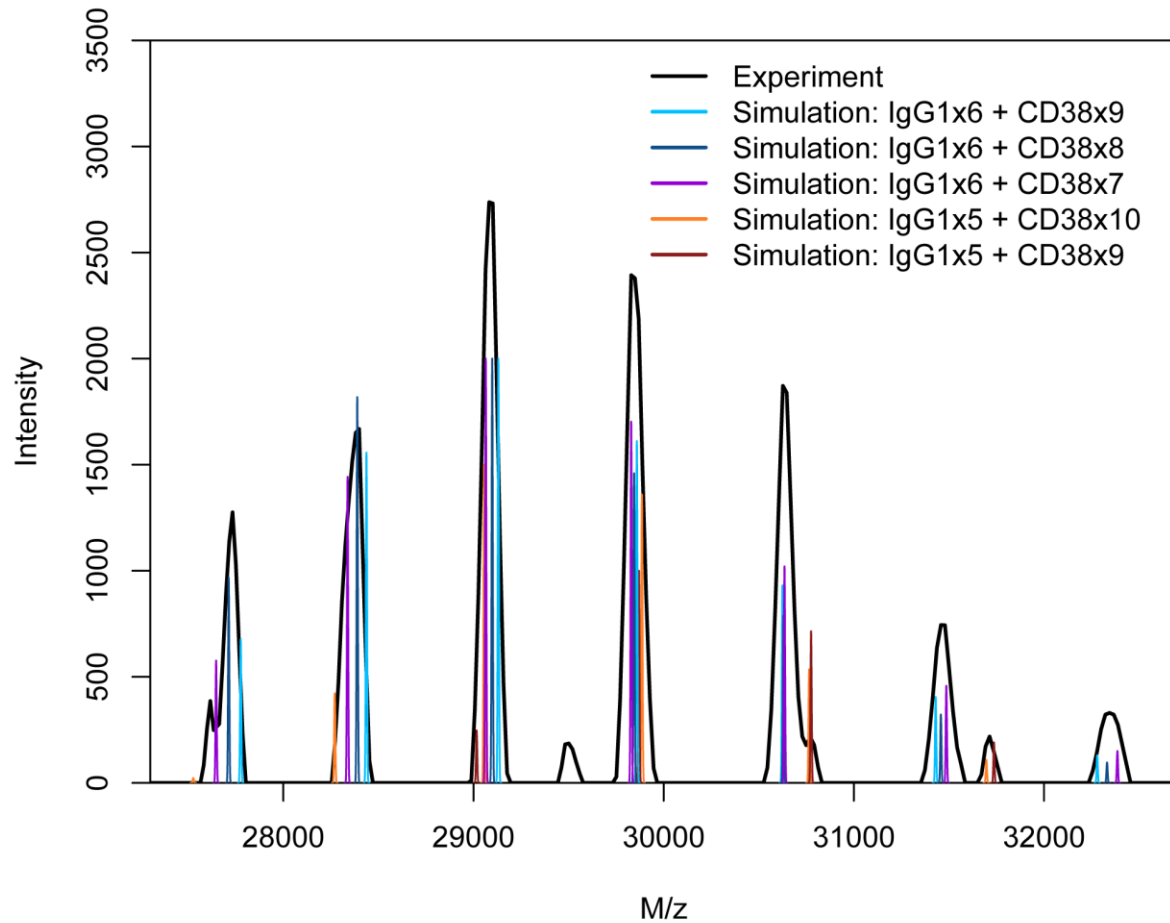

Figure S4. Tandem MS spectrum of IgG1<sub>6</sub>:CD38<sub>12</sub> at the acceleration voltage of 200V, zoom in on 27500-32500 m/z region. Similar to the precursor ions peak envelope, the broad peaks in this region correspond to several partially overlapping species. The simulation suggests that the major peak distribution originates mainly from the loss of CD38 by the IgG1<sub>6</sub>:CD38<sub>10</sub>, IgG1<sub>6</sub>:CD38<sub>9</sub> and IgG1<sub>6</sub>:CD38<sub>8</sub> precursor ions. Additional peaks can be partly explained by the loss of IgG1 from IgG1<sub>6</sub>:CD38<sub>10</sub> and IgG1<sub>6</sub>:CD38<sub>9</sub> precursor ions.

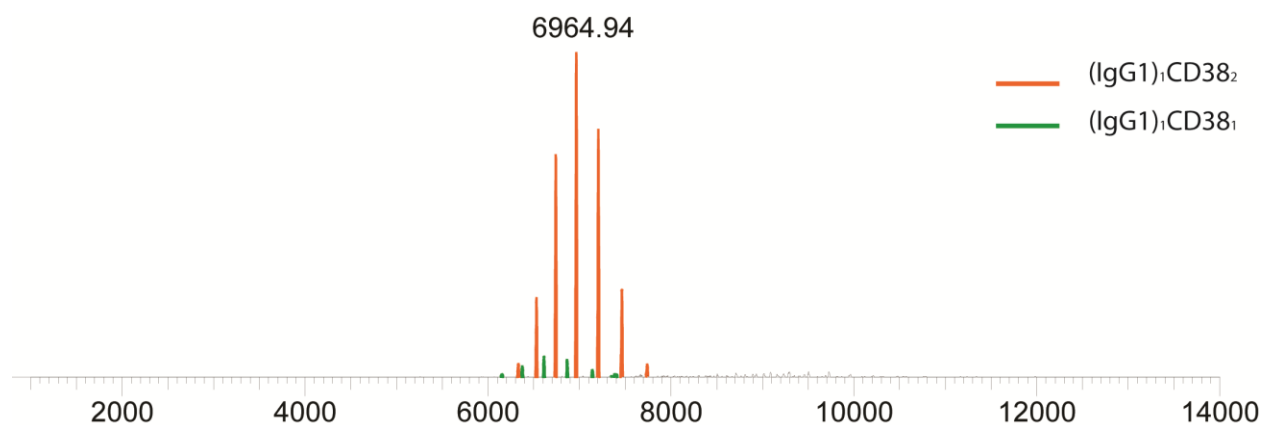

Figure S5. Native mass-spectrum of the IgG1-005:sCD38 complex acquired at a mixing ratio of 1:2.5. The relative abundances of (IgG1)<sub>1</sub>sCD38<sub>2</sub> and (IgG1)<sub>1</sub>sCD38<sub>1</sub> calculated from the peak intensities are 0.95 and 0.5 respectively.

## Supporting tables

|                    | Theoretical mass, Da | Experimental mass, Da | Mass Error, ppm | Mass Error, Da | Average Charge |
|--------------------|----------------------|-----------------------|-----------------|----------------|----------------|
| DAR 0 <sup>a</sup> | 145190.4             | 145199.0±1.7          | 59.1            | 8.6            | 23.35±0.4      |
| DAR 2 <sup>b</sup> | 147835.5             | 147836.8±1.1          | 8.4             | 1.2            | 23.24±0.3      |
| DAR 4              | 150473.3             | 150472.5±1.3          | 5.1             | 0.8            | 23.64±0.3      |
| DAR 6              | 153109.1             | 153107.1±1.5          | 13.0            | 2.0            | 24.01±0.3      |
| DAR 8              | 155743.6             | 155745.1±1.8          | 9.9             | 1.5            | 24.24±0.4      |

Table S1. Theoretical and experimental masses of brentuximab vedotin ADC with different number of MMAE molecules.

<sup>a</sup>Theoretical mass of the unconjugated parent brentuximab molecule was calculated from the sequence. The modifications taken into account include heavy chain Asn297 deamidation (+ 0.98 Da) and N-terminal pyroglutamic acid formation (- 18.02 Da). The 8.6 Da discrepancy is caused most likely by the unknown PTMs.

<sup>b</sup>Species with higher DAR values were calculated by adding theoretical mass of vcMMAE (1318.3 Da) to the experimental mass of unconjugated brentuximab.

|           | Native MS         |                   | Le et. al.        |                   |
|-----------|-------------------|-------------------|-------------------|-------------------|
|           | DAR2 <sub>F</sub> | DAR2 <sub>H</sub> | DAR2 <sub>F</sub> | DAR2 <sub>H</sub> |
| % in ADC  | 23.0              | 1.1               | 27.7              | 2.6               |
| % in DAR2 | 95.6              | 6.4               | 91.7              | 8.5               |

  

|           | Native MS           |                     | Le et. al.          |                     |
|-----------|---------------------|---------------------|---------------------|---------------------|
|           | DAR6 <sub>FFH</sub> | DAR6 <sub>FHH</sub> | DAR6 <sub>FFH</sub> | DAR6 <sub>FHH</sub> |
| % in ADC  | 1.5                 | 22.4                | 0.6                 | 10.9                |
| % in DAR6 | 6.4                 | 93.6                | 5.2                 | 94.8                |

Table S2. Positional stoichiometry and localization of the drug molecules in the DAR2 and DAR6 species calculated from the native tandem MS spectra, compared to the values obtained by Le *et. al.* using a HIC/CE-SDS approach<sup>28</sup>. The “% in ADC” depicts the fraction of the isomer compared to all the species present in ADC; “% in DAR2” and “% in DAR6” represent the fraction of the isomer compared to the species with the DAR 2 and DAR6, respectively. The subscript F and H represents the isomers with the drug bound in the Fab and hinge regions, respectively.



**IgG1-2F8-RGY monomer**

| m/z                | z  | mass(Da) | $\Delta M$ , ppm |
|--------------------|----|----------|------------------|
| 5749.91            | 26 | 149471.7 | 274.5            |
| 5981.49            | 25 | 149512.3 | 3.0              |
| 6231.21            | 24 | 149525   | 82.5             |
| 6502.82            | 23 | 149541.9 | 195.0            |
| Average mass       |    | 149512.7 |                  |
| Standard deviation |    | 25.91846 |                  |

**IgG1-2F8-RGY dimer**

| m/z                | z  | mass(Da) | $\Delta M$ , ppm |
|--------------------|----|----------|------------------|
| 7669.26            | 39 | 299062.1 | 88.8             |
| 7870.45            | 38 | 299039.1 | 165.9            |
| 8085.3             | 37 | 299119.1 | 101.5            |
| 8309.79            | 36 | 299116.4 | 92.6             |
| 8546.91            | 35 | 299106.9 | 60.5             |
| Average mass       |    | 299088.7 |                  |
| Standard deviation |    | 32.21391 |                  |

**IgG1-2F8-RGY trimer**

| m/z                | z  | mass(Da) | $\Delta M$ , ppm |
|--------------------|----|----------|------------------|
| 8794.99            | 51 | 448493.5 | 187.9            |
| 8971.22            | 50 | 448511   | 148.81           |
| 9158.04            | 49 | 448695   | 261.2            |
| 9346.47            | 48 | 448582.6 | 10.6             |
| 9545.02            | 47 | 448568.9 | 19.7             |
| 9753.14            | 46 | 448598.4 | 46.0             |
| 9969.78            | 45 | 448595.1 | 38.6             |
| Average mass       |    | 448577.8 |                  |
| Standard deviation |    | 61.08932 |                  |

**IgG1-2F8-RGY tetramer**

| m/z                | z  | mass(Da) | $\Delta M$ , ppm |
|--------------------|----|----------|------------------|
| 10312.61           | 58 | 598073.4 | 78.9             |
| 10495.15           | 57 | 598166.6 | 76.7             |
| 10682.47           | 56 | 598162.3 | 69.7             |
| 10876.93           | 55 | 598176.2 | 92.8             |
| 11075.38           | 54 | 598016.5 | 174.0            |
| 11286.45           | 53 | 598128.9 | 13.7             |
| Average mass       |    | 598120.6 |                  |
| Standard deviation |    | 57.83338 |                  |

| <b>IgG1-2F8-RGY hexamer</b> |    |          |                  |
|-----------------------------|----|----------|------------------|
| m/z                         | z  | mass(Da) | $\Delta M$ , ppm |
| 11963.74                    | 75 | 897205.5 | 109.0            |
| 12124.5                     | 74 | 897139   | 34.9             |
| 12290.4                     | 73 | 897126.2 | 20.6             |
| 12460.21                    | 72 | 897063.1 | 49.6             |
| 12636.05                    | 71 | 897088.6 | 21.3             |
| 12816.16                    | 70 | 897061.2 | 51.8             |
| 13002.52                    | 69 | 897104.9 | 3.1              |
| 13193.98                    | 68 | 897122.6 | 16.6             |
| 13388.99                    | 67 | 896995.3 | 125.2            |
| 13594.49                    | 66 | 897170.3 | 69.8             |
| Average mass                |    | 897107.7 |                  |
| Standard deviation          |    | 56.73188 |                  |

Table S3. Peak assignment of the native mass spectrum of IgG1-2F8-RGY mixed with sCD38 at a ratio of 1:2.5. No binding of sCD38 is observed.

| <b>IgG1<sub>1</sub>:sCD38<sub>2</sub></b> |    |          |                  |
|-------------------------------------------|----|----------|------------------|
| m/z                                       | z  | mass(Da) | $\Delta M$ , ppm |
| 6153.79                                   | 35 | 209228.9 | 319.0            |
| 6341.01                                   | 34 | 209253.3 | 202.1            |
| 6541.34                                   | 33 | 209322.9 | 130.2            |
| 6752.97                                   | 32 | 209342.1 | 221.9            |
| 6977.7                                    | 31 | 209331   | 169.0            |
| Average mass                              |    | 209295.6 |                  |
| Standard deviation                        |    | 50.98479 |                  |

Table S4. Peak assignment of the native mass spectrum of IgG1-005-RGY complex with sCD38 mixed with sCD38 at a ratio of 1:2.5. The binding stoichiometry is 1:2 (IgG:sCD38)

**First dissociation - IgG<sub>6</sub>:sCD38<sub>11</sub>**

| m/z                | z  | mass(Da) | ΔM, ppm |
|--------------------|----|----------|---------|
| 16550.61           | 74 | 1224671  | 144.3   |
| 16778.41           | 73 | 1224751  | 79.2    |
| 17010.93           | 72 | 1224715  | 108.5   |
| 17250.56           | 71 | 1224719  | 105.4   |
| 17500.16           | 70 | 1224941  | 76.2    |
| 17752.37           | 69 | 1224845  | 2.8     |
| 18013.86           | 68 | 1224874  | 21.7    |
| 18283.02           | 67 | 1224895  | 38.7    |
| 18560.84           | 66 | 1224949  | 82.9    |
| 18846.18           | 65 | 1224937  | 72.5    |
| 19140.1            | 64 | 1224902  | 44.5    |
| 19443.58           | 63 | 1224883  | 28.3    |
| 19758.53           | 62 | 1224967  | 97.1    |
| 20075.98           | 61 | 1224574  | 223.8   |
| 20419.26           | 60 | 1225096  | 202.2   |
| Average mass       |    | 1224848  |         |
| Standard deviation |    | 131.6    |         |

**First dissociation - IgG<sub>6</sub>:sCD38<sub>10</sub>**

| m/z                | z  | mass(Da) | ΔM, ppm |
|--------------------|----|----------|---------|
| 16361.92           | 73 | 1194347  | 105.2   |
| 16593.25           | 72 | 1194642  | 141.7   |
| 16824.43           | 71 | 1194464  | 7.8     |
| 17064.34           | 70 | 1194434  | 32.6    |
| 17312.37           | 69 | 1194485  | 9.8     |
| 17567.36           | 68 | 1194512  | 33.2    |
| 17828.71           | 67 | 1194457  | 13.6    |
| 18099.51           | 66 | 1194502  | 24.2    |
| 18378.19           | 65 | 1194517  | 37.3    |
| 18665.68           | 64 | 1194540  | 55.9    |
| 18962.36           | 63 | 1194566  | 77.8    |
| 19267.67           | 62 | 1194534  | 50.9    |
| 19583.94           | 61 | 1194559  | 72.5    |
| 19905.6            | 60 | 1194276  | 164.8   |
| 20243.38           | 59 | 1194300  | 144.3   |
| 20594.64           | 58 | 1194431  | 34.9    |
| Average mass       |    | 1194473  |         |
| Standard deviation |    | 95.3     |         |

**Second dissociation - IgG<sub>6</sub>:sCD38<sub>10</sub>**

| m/z                | z  | mass(Da) | ΔM, ppm |
|--------------------|----|----------|---------|
| 21713.96           | 55 | 1194213  | 217.7   |
| 22121.66           | 54 | 1194516  | 35.9    |
| 22537.64           | 53 | 1194442  | 25.8    |
| 22972.54           | 52 | 1194520  | 39.6    |
| 23422.4            | 51 | 1194491  | 15.6    |
| 23889.87           | 50 | 1194444  | 24.5    |
| 24378.27           | 49 | 1194486  | 11.2    |
| 24885.76           | 48 | 1194468  | 3.6     |
| 25416.46           | 47 | 1194527  | 45.1    |
| 25976.87           | 46 | 1194890  | 349.3   |
| Average mass       |    | 1194500  |         |
| Standard deviation |    | 156.1    |         |

| First dissociation - IgG <sub>6</sub> :sCD38 <sub>9</sub> |    |          |         | Second dissociation - IgG <sub>6</sub> :sCD38 <sub>9</sub> |    |          |         |
|-----------------------------------------------------------|----|----------|---------|------------------------------------------------------------|----|----------|---------|
| m/z                                                       | z  | mass(Da) | ΔM, ppm | m/z                                                        | z  | mass(Da) | ΔM, ppm |
| 16403.94                                                  | 71 | 1164609  | 302.1   | 21559.14                                                   | 54 | 1164140  | 46.2    |
| 16639.05                                                  | 70 | 1164664  | 348.0   | 21964.84                                                   | 53 | 1164084  | 1.9     |
| 16872.91                                                  | 69 | 1164162  | 72.0    | 22388                                                      | 52 | 1164124  | 32.9    |
| 17122.61                                                  | 68 | 1164269  | 18.1    | 22825.05                                                   | 51 | 1164027  | 50.9    |
| 17377.04                                                  | 67 | 1164195  | 44.5    | 23284.08                                                   | 50 | 1164154  | 58.6    |
| 17639.87                                                  | 66 | 1164165  | 69.0    | 23758.71                                                   | 49 | 1164128  | 36.1    |
| 17913.8                                                   | 65 | 1164332  | 70.5    | 24252.54                                                   | 48 | 1164074  | 10.2    |
| 18191.56                                                  | 64 | 1164196  | 43.5    | 24769.21                                                   | 47 | 1164106  | 17.3    |
| 18477.16                                                  | 63 | 1163998  | 209.1   | 25303.97                                                   | 46 | 1163937  | 128.1   |
| 18773.4                                                   | 62 | 1163889  | 300.6   | Average mass                                               |    | 1164086  |         |
| Average mass                                              |    | 1164248  |         | Standard deviation                                         |    | 64.2     |         |
| Standard deviation                                        |    | 228.4    |         |                                                            |    |          |         |

  

| Second dissociation - IgG <sub>6</sub> :sCD38 <sub>8</sub> |    |          |         |
|------------------------------------------------------------|----|----------|---------|
| m/z                                                        | z  | mass(Da) | ΔM, ppm |
| 21803.21                                                   | 52 | 1133715  | 79.9    |
| 22227.06                                                   | 51 | 1133529  | 84.0    |
| 22678.61                                                   | 50 | 1133881  | 226.0   |
| 23132.94                                                   | 49 | 1133465  | 140.5   |
| 23617.89                                                   | 48 | 1133611  | 12.0    |
| 24121.42                                                   | 47 | 1133660  | 31.2    |
| 24642.53                                                   | 46 | 1133510  | 100.5   |
| Average mass                                               |    | 1133624  |         |
| Standard deviation                                         |    | 132.4    |         |

Table S5. Peak assignment of the CID fragments of IgG1<sub>6</sub>:sCD38<sub>12</sub> parent assembly at 150V HCD accelerating voltage.

|                                       | Relative abundance, %        |                              |
|---------------------------------------|------------------------------|------------------------------|
|                                       | 1 <sup>st</sup> dissociation | 2 <sup>nd</sup> dissociation |
| IgG <sub>6</sub> :sCD38 <sub>11</sub> | 51.7                         |                              |
| IgG <sub>6</sub> :sCD38 <sub>10</sub> | 38.3                         | 53                           |
| IgG <sub>6</sub> :sCD38 <sub>9</sub>  | 10                           | 37.6                         |
| IgG <sub>6</sub> :sCD38 <sub>8</sub>  |                              | 9.3                          |

Table S6. Relative abundances of CID fragments of IgG1<sub>6</sub>:sCD38<sub>12</sub> parent assembly at 150V HCD accelerating voltage calculated from summed peak intensities after 1<sup>st</sup> and second dissociation event.
